# Supplementary material for: Two multifunctional Dy(iii)-based metal–organic frameworks exhibiting proton conduction, magnetic properties and second-harmonic generation
Source: Royal Society of Chemistry journal article supplement (doi:10.1039/d4ce00065j), 2024-01-01
Supplement: d4ce00065j1.pdf [file d4ce00065j1.pdf]

## Supporting Information

### Two multifunctional Dy(III)-based metal-organic frameworks exhibiting proton conduction, magnetic properties and second-harmonic generation

Ya-Qing Liao, Tian-Zheng Xiong, Kang-Le Xie, Huan Zhang, Jun-Jie Hu\* and He-Rui Wen

**Table S1.** X-ray diffraction crystallographic data for **1** and **2**.

**Table S2.** Selected bond lengths (Å) and bond angles (°) for **1**.

**Table S3.** Selected bond lengths (Å) and bond angles (°) for **2**.

**Table S4.** Summary of SHAPE analysis of Dy1 and Dy2 for **1**.

**Table S5.** Summary of SHAPE analysis of Dy1 for **2**.

**Scheme 1.** Synthesis of the H<sub>4</sub>TPTC-2OMe linker.

**Figure S1.** IR spectra for **1** and **2**.

**Figure S2** The triangular dodecahedron (TDD-8) coordination geometry Dy<sup>III</sup> in **1**.

**Figure S3** The Muffin coordination geometry of Dy<sup>III</sup> in **2**.

**Figure S4** The 2D layer of MOF **2** from different directions.

**Figure S5** The simulated and experimental PXRD patterns of as-synthesized sample of **1** (a) and **2** (b).

**Figure S6** TGA of **1** from 30 °C to 1000 °C.

**Figure S7** TGA of **2** from 30 °C to 1000 °C.

**Figure S8.** Plot of proton conductivity vs. RH at 25 °C for **1** (a) and **2** (b).

**Table S6.** Nyquist plots for **1** and **2** at different humid (RH%) under 25 °C.

**Table S7.** The proton conductivity of **1** and **2** under variable temperature at 98% RH.

**Figure S9.** PXRD of compound **1** and **2** after proton conduction.

**Figure S10.** Temperature dependence of the magnetic susceptibility between 2 and 300 K and  $\chi_M^{-1}$  vs  $T$  plots of MOFs **1** (a) and **2** (b). Red lines for the Curie–Weiss fitting.

**Figure S11.** Experimental  $M$  versus  $HT^{-1}$  plots of **1** (a) and **2** (b) at 2 K.

**Figure S12.** The in-phase ( $\chi'$ ) and out-of-phase ( $\chi''$ ) components of ac magnetic susceptibility for **1** at  $H_{dc} = 0$  Oe.

**Figure S13.** The in-phase ( $\chi'$ ) and out-of-phase ( $\chi''$ ) components of ac magnetic susceptibility for **2** at  $H_{dc} = 0$  Oe.

**Table S8.** The fitting parameters  $\alpha$  and  $\tau$  values for **1** and **2** by using CC-FIT software from 2 to 3.5 K at  $H_{dc} = 2$  kOe.

**Figure 14.** Temperature dependence of the in-phase ( $\chi'$ ) (a) and out-of-phase ( $\chi''$ ) (b) ac susceptibility for **2** under 2 kOe applied dc field.

**Figure 15.**  $\ln(\chi''/\chi')$  vs.  $T^{-1}$  of MOF **2** under different frequency.

## Materials and General Methods.

Dy(NO<sub>3</sub>)<sub>3</sub>·6H<sub>2</sub>O, dimethylformamide (DMF) and lactic acid adopted were commercially available without additional purification. The H<sub>4</sub>TPTC-2OMe ligand employed was synthesized by the previous literature.<sup>1</sup> Elements analyses of C, H and O were performed on an Elementar Vario EL III microanalyzer. Powder X-ray diffraction (PXRD) patterns were carried out on a Rigaku D/Max-2500 diffractometer with a Cu-target tube, and the simulated PXRD patterns were acquired from the Mercury Version 1.4 software (<http://www.ccdc.cam.ac.uk/products/mercury>). Fourier transform infrared (FTIR) spectra were recorded on an ALPHA (Bruker) spectrophotometer with KBr pellets (400–4000 cm<sup>-1</sup>). Thermogravimetric analyses (TGA) were conducted with a NETZSCH STA2500 (TG/DTA) thermal analyzer under a N<sub>2</sub> gas flow. The temperature varied from room temperature to 1000 °C at a heating rate of 10 °C/min. Proton conductivity measurements were tested *via* a quasi-four-electrode AC impedance technique utilizing a Solartron 1260 impedance/gain-phase analyzer. The SHG efficiency measurements were carried out on Mini NOTS 1064VT nonlinear optical test system based on powder crystalline samples adopting a modified Kurtz Perry method. Magnetic susceptibilities were obtained using a Quantum Design PPMS model 6000 magnetometer.

## Proton Conductivity Measurements.

The AC impedance measurements were carried out on a Solartron 1260 impedance/gain-phase analyzer based on a quasi-four-electrode AC impedance technique. The powders of **1** and **2** were pressed into pieces under 0.1 GPa pressure and measured to be 0.63 mm for **1**, 0.86 mm for **2** in thickness and 2.5 mm in diameter by vernier calipers. Both sides of the sample are connected with gold wires through the gold paste. The proton conductivities were obtained by changing the humidity (60–98%) and the temperature (25–50 °C) over a frequency domain of 1–10<sup>7</sup> Hz. The proton conductivities were obtained by fitting the Nyquist plots using ZView2 software. The proton conductivities were obtained according to the formula:  $\sigma = L/(RS)$  ( $\sigma$  = proton conductivity (S cm<sup>-1</sup>), L = thickness (cm) of the circular pellet, S = flat surface area (cm<sup>2</sup>) of the circular pellets and R = bulk resistance (Ω)). The activation energy ( $E_a$ ) was calculated according to the formula:  $\sigma T = A \exp(E_a/k_B T)$ , where  $\sigma$ ,  $T$ ,  $A$ ,  $E_a$ , and  $k_B$  represent the proton conductivity (S cm<sup>-1</sup>), absolute temperature (K), Boltzmann constant (eV/K), activation energy(eV), pre-exponential factor, respectively.

**Table S1.** X-ray diffraction crystallographic data for **1** and **2**.

|                                                                                                                | <b>1</b>                                                            | <b>2</b>                                          |
|----------------------------------------------------------------------------------------------------------------|---------------------------------------------------------------------|---------------------------------------------------|
| Formula                                                                                                        | C <sub>288</sub> H <sub>248</sub> Dy <sub>16</sub> O <sub>160</sub> | C <sub>24</sub> H <sub>21</sub> DyO <sub>13</sub> |
| Mr                                                                                                             | 8868.85                                                             | 679.92                                            |
| T/K                                                                                                            | 295                                                                 | 297                                               |
| cryst syst                                                                                                     | Orthorhombic                                                        | Triclinic                                         |
| space group                                                                                                    | <i>Fdd2</i>                                                         | <i>P</i> $\bar{1}$                                |
| <i>a</i> /Å                                                                                                    | 28.3208(13)                                                         | 10.0739(5)                                        |
| <i>b</i> /Å                                                                                                    | 39.2416(17)                                                         | 10.1946(5)                                        |
| <i>c</i> /Å                                                                                                    | 16.2646(6)                                                          | 12.6937(6)                                        |
| $\alpha$ /deg                                                                                                  | 90                                                                  | 76.507(1)                                         |
| $\beta$ /deg                                                                                                   | 90                                                                  | 86.196(2)                                         |
| $\gamma$ /deg                                                                                                  | 90                                                                  | 71.856(1)                                         |
| V/Å <sup>3</sup>                                                                                               | 18075.7(13)                                                         | 1204.59 (10)                                      |
| Z                                                                                                              | 2                                                                   | 2                                                 |
| D <sub>calcd</sub> /g cm <sup>-3</sup>                                                                         | 1.629                                                               | 1.875                                             |
| $\mu$ /mm <sup>-1</sup>                                                                                        | 3.338                                                               | 3.17                                              |
| <i>F</i> (000)                                                                                                 | 8624.0                                                              | 670.457                                           |
| Crystal size/mm <sup>3</sup>                                                                                   | 0.23 × 0.23 × 0.21                                                  | 0.20 × 0.20 × 0.23                                |
| Reflns collected                                                                                               | 68161                                                               | 17781                                             |
| GOF(F <sup>2</sup> )                                                                                           | 1.058                                                               | 1.05                                              |
| <i>R</i> <sub>1</sub> <sup>a</sup> / <i>wR</i> <sub>2</sub> <sup>b</sup> [ <i>I</i> > 2 $\sigma$ ( <i>I</i> )] | 0.0256, 0.0665                                                      | 0.0595, 0.0661                                    |
| <i>R</i> <sub>1</sub> <sup>a</sup> / <i>wR</i> <sub>2</sub> <sup>b</sup> [all data]                            | 0.0288, 0.0684                                                      | 0.0409, 0.0646                                    |

$${}^aR_1 = \sum ||F_o| - |F_c|| / \sum |F_o|, \quad {}^b wR_2 = [\sum w(F_o^2 - F_c^2)^2 / \sum w(F_o^2)^2]^{1/2}$$

**Table S2.** Selected bond lengths (Å) and bond angles (°) for **1**.

|                                         |            |                                        |            |
|-----------------------------------------|------------|----------------------------------------|------------|
| Dy1—O17 <sup>i</sup>                    | 2.301 (4)  | Dy2—O11                                | 2.286 (5)  |
| Dy1—O6                                  | 2.312 (5)  | Dy2—O15                                | 2.288 (5)  |
| Dy1—O12 <sup>i</sup>                    | 2.330 (5)  | Dy2—O5 <sup>iii</sup>                  | 2.325 (5)  |
| Dy1—O16 <sup>ii</sup>                   | 2.417 (5)  | Dy2—O18 <sup>v</sup>                   | 2.3376 (5) |
| Dy1—O7                                  | 2.420 (7)  | Dy2—O13                                | 2.436 (7)  |
| Dy1—O8                                  | 2.449 (6)  | Dy2—O14                                | 2.487 (6)  |
| Dy1—O4 <sup>iii</sup>                   | 2.463 (5)  | Dy2—O15                                | 2.288 (5)  |
| Dy1—O1 <sup>iii</sup>                   | 2.607 (5)  | Dy2—O18 <sup>v</sup>                   | 2.376 (5)  |
| O17 <sup>i</sup> —Dy1—O6                | 108.4 (2)  | O11—Dy2—O15                            | 104.3 (2)  |
| O17 <sup>i</sup> —Dy1—O12 <sup>i</sup>  | 76.38 (18) | O11—Dy2—O5 <sup>v</sup>                | 80.2 (2)   |
| O6—Dy1—O12 <sup>i</sup>                 | 81.19 (19) | O15—Dy2—O5 <sup>v</sup>                | 78.2 (2)   |
| O17 <sup>i</sup> —Dy1—O16 <sup>ii</sup> | 82.10 (17) | O11—Dy2—O18 <sup>vi</sup>              | 158.9 (2)  |
| O6—Dy1—O16 <sup>ii</sup>                | 156.6 (2)  | O15—Dy2—O18 <sup>vi</sup>              | 82.74 (18) |
| O12 <sup>i</sup> —Dy1—O16 <sup>ii</sup> | 81.16 (19) | O5 <sup>v</sup> —Dy2—O18 <sup>vi</sup> | 81.86 (19) |
| O17 <sup>i</sup> —Dy1—O7                | 147.7 (2)  | O11—Dy2—O13                            | 88.7 (3)   |
| O6—Dy1—O7                               | 85.5 (3)   | O15—Dy2—O13                            | 147.2 (3)  |
| O12 <sup>i</sup> —Dy1—O7                | 77.2 (2)   | O5 <sup>vi</sup> —Dy2—O13              | 74.4 (3)   |
| O16 <sup>ii</sup> —Dy1—O7               | 75.7 (2)   | O18 <sup>vi</sup> —Dy2—O13             | 75.8 (3)   |
| O17 <sup>i</sup> —Dy1—O8                | 67.97 (19) | O11—Dy2—O14                            | 75.0 (3)   |

Symmetry codes: (i)  $3/4-x, 1/4+y, 3/4+z$ ; (ii)  $-1/4+x, 3/4-y, 5/4+z$ ; (iii)  $3+x, +y, 1+z$ ; (iv)  $3/4-x, -1/4+y, -3/4+z$ ; (v)  $1-x, 1/2-y, -1/2+z$ ; (vi)  $6+x, +y, -1+z$ ; (vii)  $3/2-x, 1/2-y, +z$ .

**Table S3.** Selected bond lengths (Å) and bond angles (°) for **2**.

|                                          |             |                                         |             |
|------------------------------------------|-------------|-----------------------------------------|-------------|
| Dy1—O2 <sup>ii</sup>                     | 2.454 (3)   | Dy1—O6 <sup>i</sup>                     | 2.324 (3)   |
| Dy1—O3                                   | 2.337 (3)   | Dy1—O7 <sup>iii</sup>                   | 2.467 (3)   |
| Dy1—O3 <sup>i</sup>                      | 2.600 (3)   | Dy1—O8 <sup>iii</sup>                   | 2.494 (3)   |
| Dy1—O4 <sup>i</sup>                      | 2.442 (3)   | Dy1—O9                                  | 2.389 (3)   |
| Dy1—O5                                   | 2.309 (3)   | O6 <sup>i</sup> —Dy1—O3 <sup>i</sup>    | 70.55 (10)  |
| O3 <sup>i</sup> —Dy1—O2 <sup>ii</sup>    | 102.96 (11) | O6 <sup>i</sup> —Dy1—O4 <sup>i</sup>    | 81.92 (11)  |
| O3—Dy1—O2 <sup>ii</sup>                  | 143.84 (12) | O6 <sup>i</sup> —Dy1—O5                 | 135.42 (11) |
| O4 <sup>i</sup> —Dy1—O2 <sup>ii</sup>    | 66.53 (11)  | O7 <sup>iii</sup> —Dy1—O2 <sup>ii</sup> | 115.82 (11) |
| O4 <sup>i</sup> —Dy1—O3                  | 122.33 (10) | O7 <sup>iii</sup> —Dy1—O3               | 77.95 (11)  |
| O4 <sup>i</sup> —Dy1—O3 <sup>i</sup>     | 51.01 (10)  | O7 <sup>iii</sup> —Dy1—O3 <sup>i</sup>  | 141.16 (10) |
| O5—Dy1—O2 <sup>ii</sup>                  | 71.61 (12)  | O7 <sup>iii</sup> —Dy1—O4 <sup>i</sup>  | 144.77 (12) |
| O5—Dy1—O3                                | 72.75 (12)  | O7 <sup>iii</sup> —Dy1—O5               | 120.48 (12) |
| O5—Dy1—O3 <sup>i</sup>                   | 72.77 (11)  | O7 <sup>iii</sup> —Dy1—O6 <sup>i</sup>  | 77.60 (11)  |
| O5—Dy1—O4 <sup>i</sup>                   | 94.15 (12)  | O8 <sup>iii</sup> —Dy1—O2 <sup>ii</sup> | 68.64 (11)  |
| O6 <sup>i</sup> —Dy1—O2 <sup>ii</sup>    | 141.14 (12) | O8 <sup>iii</sup> —Dy1—O3               | 102.95 (11) |
| O6 <sup>i</sup> —Dy1—O3                  | 72.37 (11)  | O8 <sup>iii</sup> —Dy1—O3 <sup>i</sup>  | 158.61 (10) |
| O8 <sup>iii</sup> —Dy1—O4 <sup>i</sup>   | 132.58 (10) | O9—Dy1—O3                               | 141.19 (13) |
| O8 <sup>iii</sup> —Dy1—O5                | 85.85 (11)  | O9—Dy1—O4 <sup>i</sup>                  | 74.43 (12)  |
| O8 <sup>iii</sup> —Dy1—O6 <sup>i</sup>   | 128.61 (10) | O9—Dy1—O5                               | 145.11 (12) |
| O8 <sup>iii</sup> —Dy1—O7 <sup>iii</sup> | 52.15 (10)  | O9—Dy1—O6 <sup>i</sup>                  | 76.55 (12)  |
| O9—Dy1—O2 <sup>ii</sup>                  | 73.62 (13)  | O9—Dy1—O7 <sup>iii</sup>                | 73.11 (13)  |
| O9—Dy1—O3 <sup>i</sup>                   | 118.52 (11) | O9—Dy1—O8 <sup>iii</sup>                | 78.98 (11)  |

Symmetry codes: (i)  $-x+1, -y+1, -z+1$ ; (ii)  $x-1, y, z$ ; (iii)  $x, y+1, z$ ; (iv)  $-x+1, -y+2, -z$ ; (v)  $-x, -y+1, -z$ ; (vi)  $x+1, y, z$ ; (vii)  $x, y-1, z$ .

**Table S4.** Summary of SHAPE analysis of Dy1 and Dy2 for **1**.

| Label        | Shape                                      | Symmetry                   | Distortion ( $\tau$ ) |              |
|--------------|--------------------------------------------|----------------------------|-----------------------|--------------|
|              |                                            |                            | Dy1                   | Dy2          |
| OP-8         | Octagon                                    | $D_{8h}$                   | 32.723                | 31.584       |
| HPY-8        | Heptagonal pyramid                         | $C_{7v}$                   | 22.986                | 23.020       |
| HBPY-8       | Hexagonal bipyramid                        | $D_{6h}$                   | 13.228                | 12.295       |
| CU-8         | Cube                                       | $Oh$                       | 8.394                 | 7.651        |
| SAPR-8       | Square antiprism                           | $D_{4d}$                   | 2.792                 | 3.424        |
| <b>TDD-8</b> | <b>Triangular dodecahedron</b>             | <b><math>D_{2d}</math></b> | <b>1.511</b>          | <b>1.169</b> |
| JGBF-8       | Johnson gyrobifastigium J26                | $D_{2d}$                   | 14.134                | 14.559       |
| JETBPY-8     | Johnson elongated triangular bipyramid J14 | $D_{3h}$                   | 25.221                | 26.753       |
| JBTPR-8      | Biaugmented trigonal prism J50             | $C_{2v}$                   | 3.356                 | 3.616        |
| BTPR-8       | Biaugmented trigonal prism                 | $C_{2v}$                   | 2.804                 | 2.958        |
| JSD-8        | Snub diphenoid J84                         | $D_{2d}$                   | 4.102                 | 3.876        |
| TT-8         | Triakis tetrahedron                        | $T_d$                      | 9.080                 | 8.349        |
| ETBPY-8      | Elongated trigonal bipyramid               | $D_{3h}$                   | 21.096                | 22.214       |

**Table S5.** Summary of SHAPE analysis of Dy1 for **2**.

| Label        | Shape                              | Symmetry                | Distortion ( $\tau$ ) |
|--------------|------------------------------------|-------------------------|-----------------------|
|              |                                    |                         | Dy                    |
| EP-9         | Enneagon                           | $D_{9h}$                | 33.125                |
| OPY-9        | Octagonal pyramid                  | $C_{8v}$                | 21.002                |
| HBPY-9       | Heptagonal bipyramid               | $D_{7h}$                | 14.905                |
| JTC-9        | Johnson triangular cupola J3       | $C_{3v}$                | 14.940                |
| JCCU-9       | Capped cube J8                     | $C_{4v}$                | 9.857                 |
| CCU-9        | Spherical-relaxed capped cube      | $C_{4v}$                | 8.691                 |
| JCSAPR-9     | Capped square antiprism J10        | $C_{4v}$                | 3.474                 |
| CSAPR-9      | Spherical capped square antiprism  | $C_{4v}$                | 2.554                 |
| JTCTPR-9     | Tricapped trigonal prism J51       | $D_{3h}$                | 4.209                 |
| TCTPR-9      | Spherical tricapped trigonal prism | $D_{3h}$                | 3.497                 |
| JTDIC-9      | Tridiminished icosahedron J63      | $C_{3v}$                | 11.560                |
| HH-9         | Hula-hoop                          | $C_{2v}$                | 7.413                 |
| <b>MFF-9</b> | <b>Muffin</b>                      | <b><math>C_s</math></b> | <b>1.902</b>          |

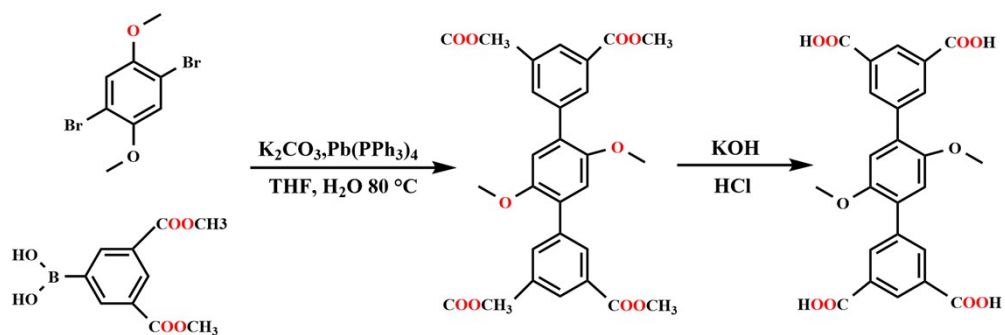

Scheme 1. Synthesis of the H<sub>4</sub>TPTC-2OMe linker.

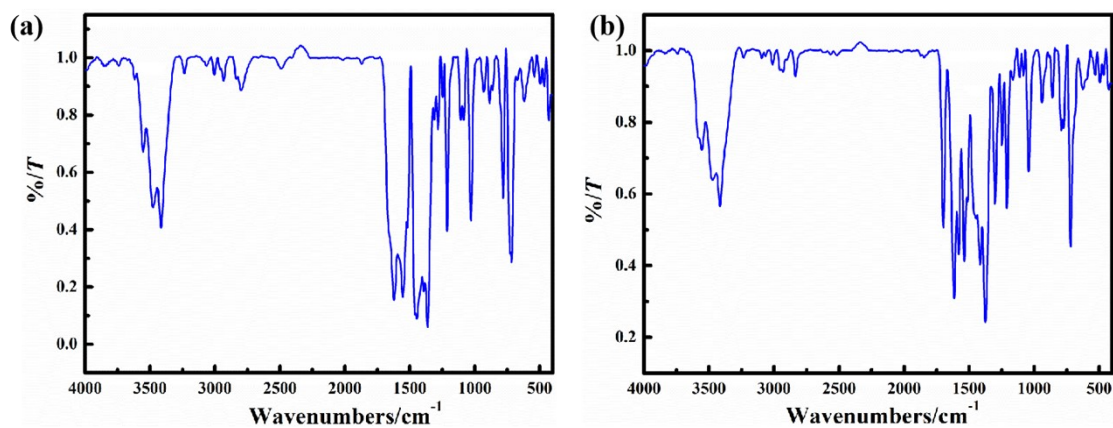

Figure S1. IR spectra for 1 and 2.

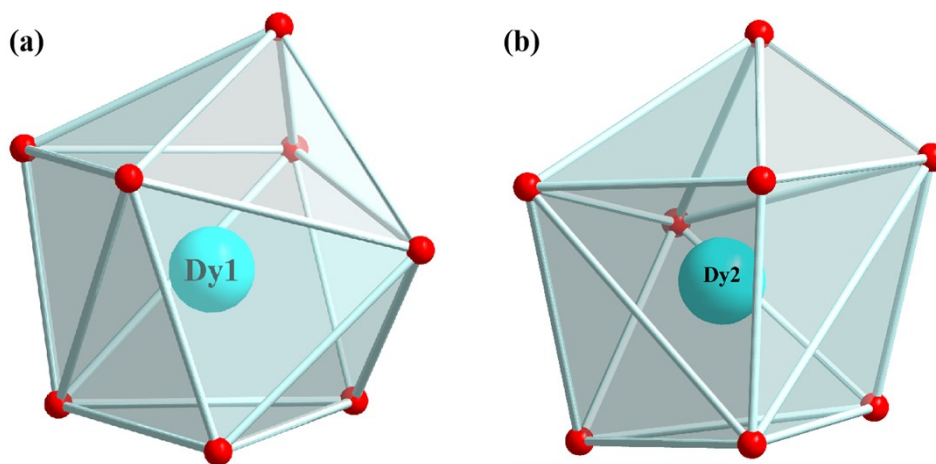

Figure S2. The triangular dodecahedron (TDD-8) coordination geometry Dy<sup>III</sup> in 1.

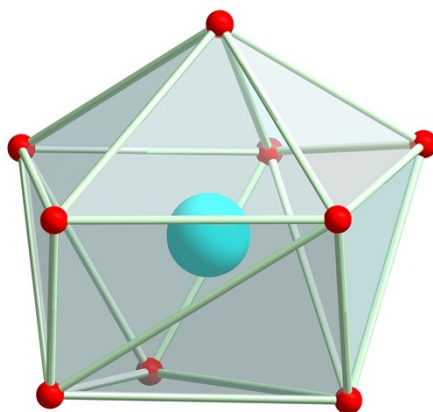



Figure S3. The Muffin coordination geometry of Dy<sup>III</sup> in 2.

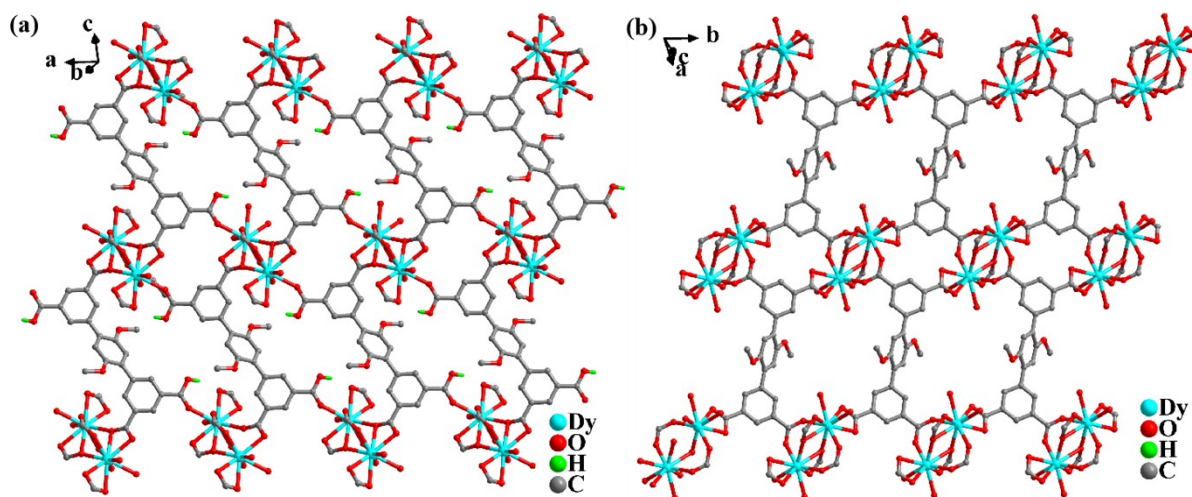

Figure S4. The 2D layer of MOF 2 from different directions.

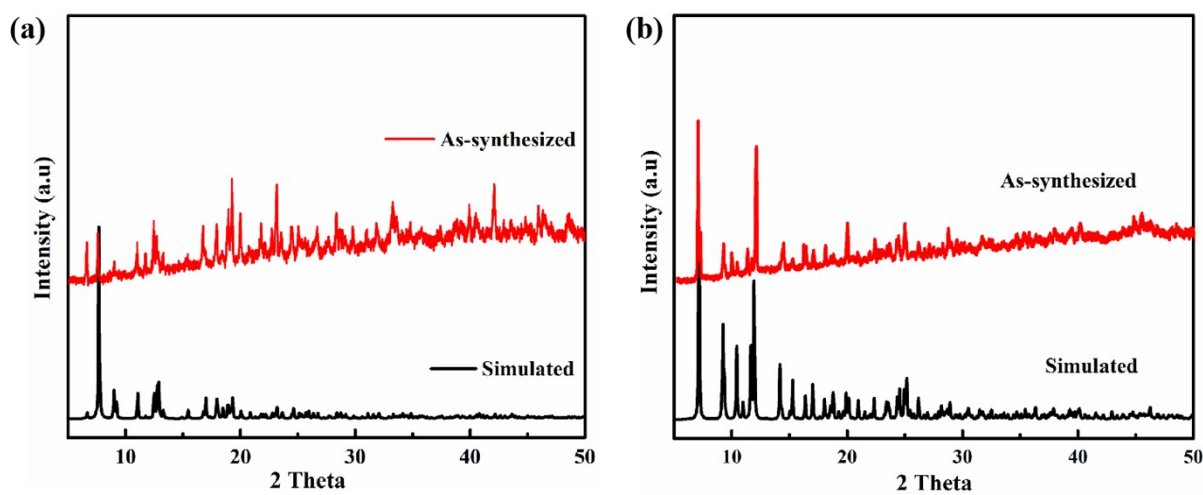

Figure S5. The simulated and experimental PXRD patterns of as-synthesized sample of 1 (a) and 2 (b).

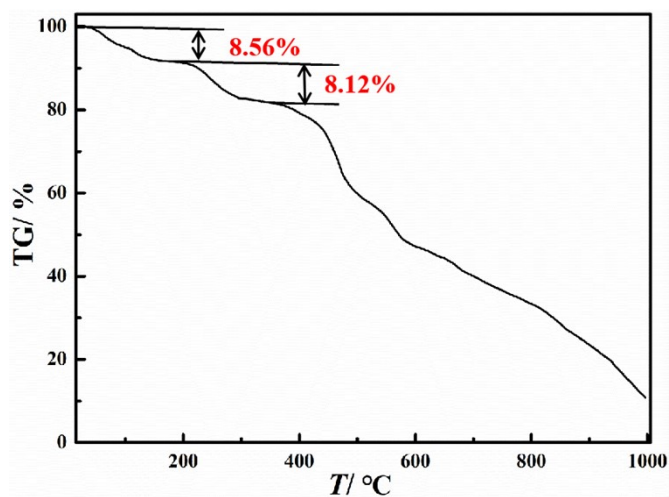

Figure S6. TGA of 1 from 30 °C to 1000 °C.

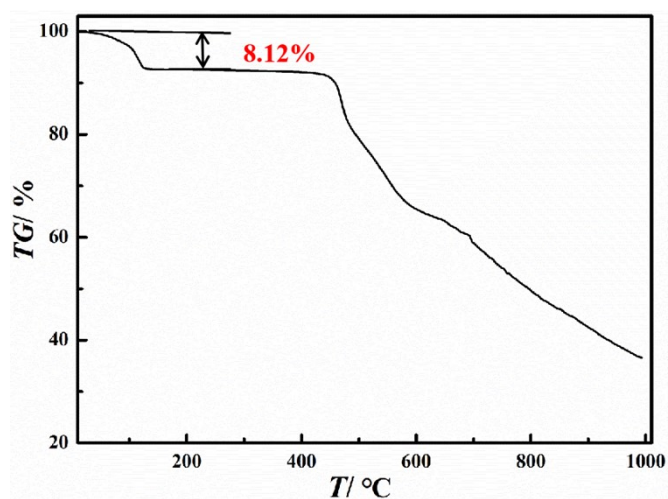

Figure S7. TGA of 2 from 30 °C to 1000 °C.

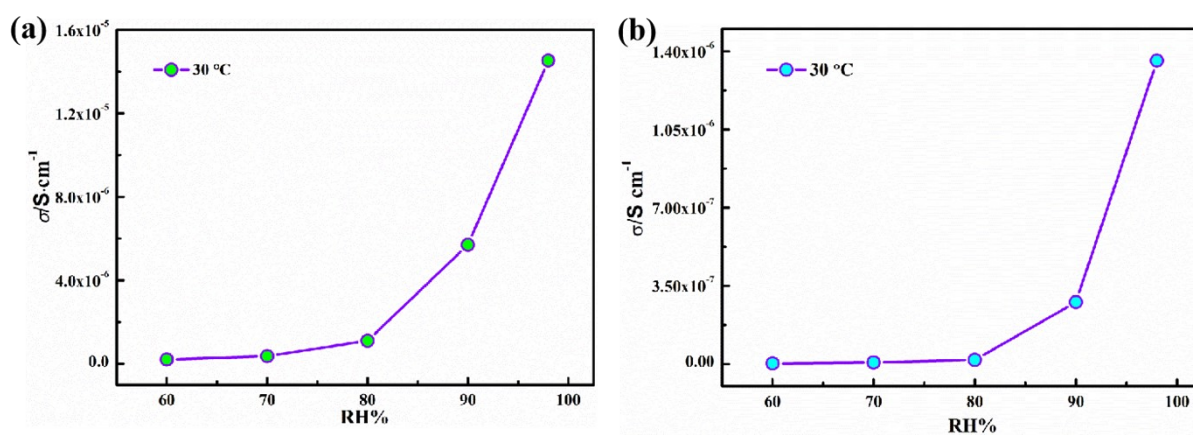

Figure S8. Plot of proton conductivity vs. RH at 25 °C for 1 (a) and 2 (b).

Table S6. Nyquist plots for 1 and 2 at different humid (RH%) under 25 °C.

| Condition | $\sigma$ (S $\text{cm}^{-1}$ ) |                       |
|-----------|--------------------------------|-----------------------|
|           | RE-MOF 1                       | RE-MOF 2              |
| 60%-25 °C | $2.07 \times 10^{-7}$          | $2.54 \times 10^{-9}$ |
| 70%-25 °C | $3.72 \times 10^{-7}$          | $6.54 \times 10^{-9}$ |
| 80%-25 °C | $1.11 \times 10^{-6}$          | $1.86 \times 10^{-8}$ |
| 90%-25 °C | $5.70 \times 10^{-6}$          | $2.77 \times 10^{-7}$ |
| 98%-25 °C | $1.45 \times 10^{-5}$          | $1.36 \times 10^{-6}$ |

**Table S7.** The proton conductivity of **1** and **2** under variable temperature at 98% RH.

| Condition   | $\sigma$ (S cm <sup>-1</sup> ) |                       |
|-------------|--------------------------------|-----------------------|
|             | RE-MOF <b>1</b>                | RE-MOF <b>2</b>       |
| 25 °C-98%RH | $1.45 \times 10^{-5}$          | $1.36 \times 10^{-6}$ |
| 30 °C-98%RH | $2.57 \times 10^{-5}$          | $1.99 \times 10^{-6}$ |
| 35 °C-98%RH | $4.50 \times 10^{-5}$          | $2.65 \times 10^{-6}$ |
| 40 °C-98%RH | $6.98 \times 10^{-5}$          | $3.13 \times 10^{-6}$ |
| 45 °C-98%RH | $1.33 \times 10^{-4}$          | $3.34 \times 10^{-6}$ |
| 50 °C-98%RH | $1.69 \times 10^{-4}$          | $3.52 \times 10^{-6}$ |

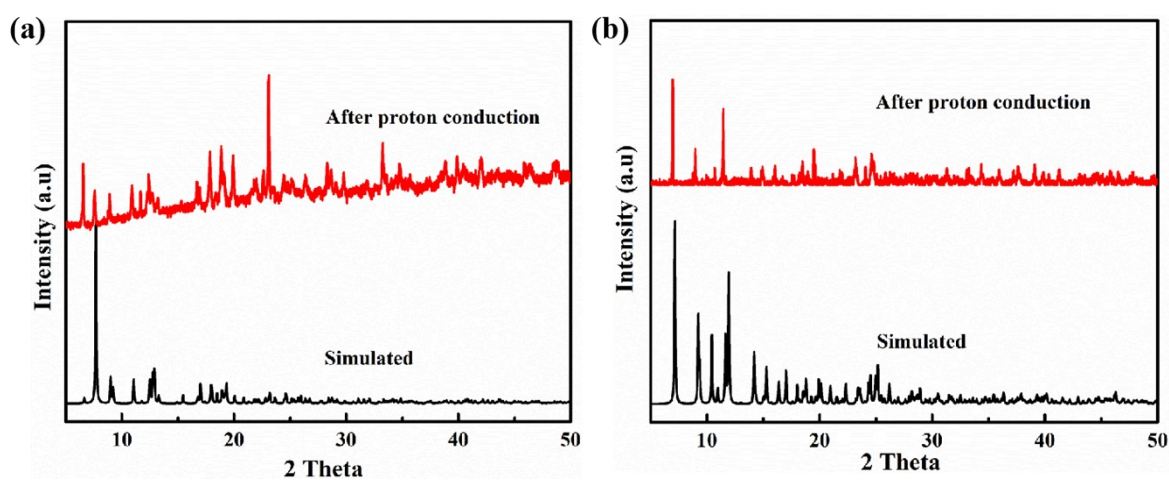

**Figure S9.** PXRD of compound **1** and **2** after proton conduction.

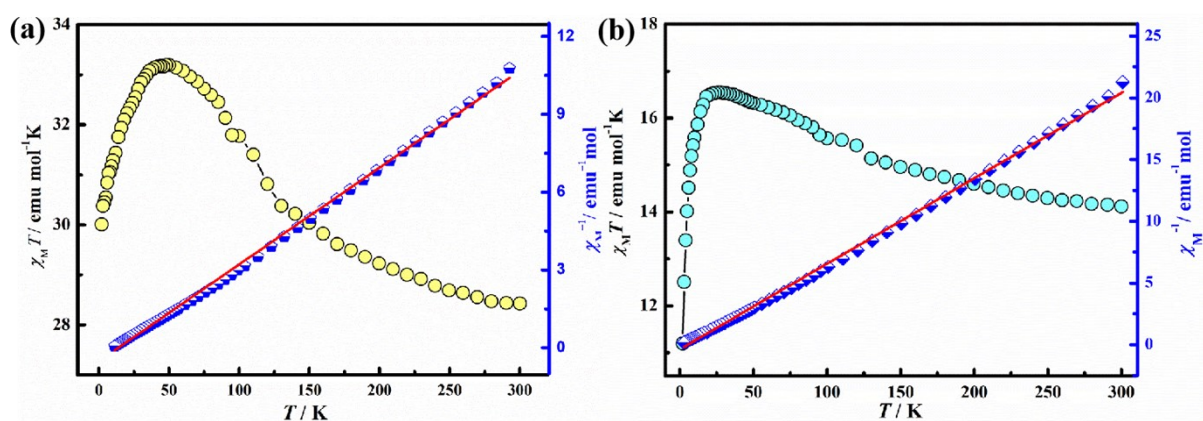

**Figure S10.** Temperature dependence of the magnetic susceptibility between 2 and 300 K and  $\chi_M^{-1}$  vs  $T$  plots of MOFs **1** (a) and **2** (b). Red lines for the Curie–Weiss fitting.

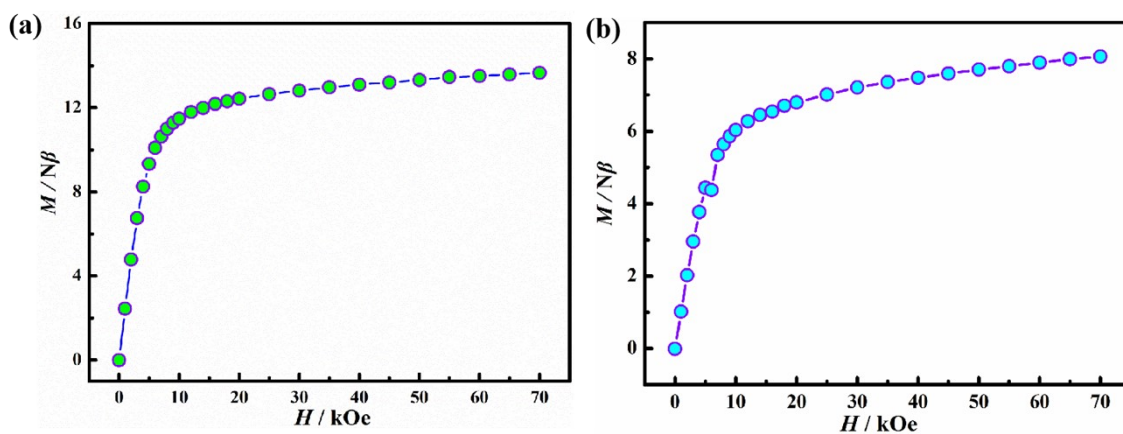

**Figure S11.** Experimental  $M$  versus  $HT^{-1}$  plots of **1** (a) and **2** (b) at 2 K.

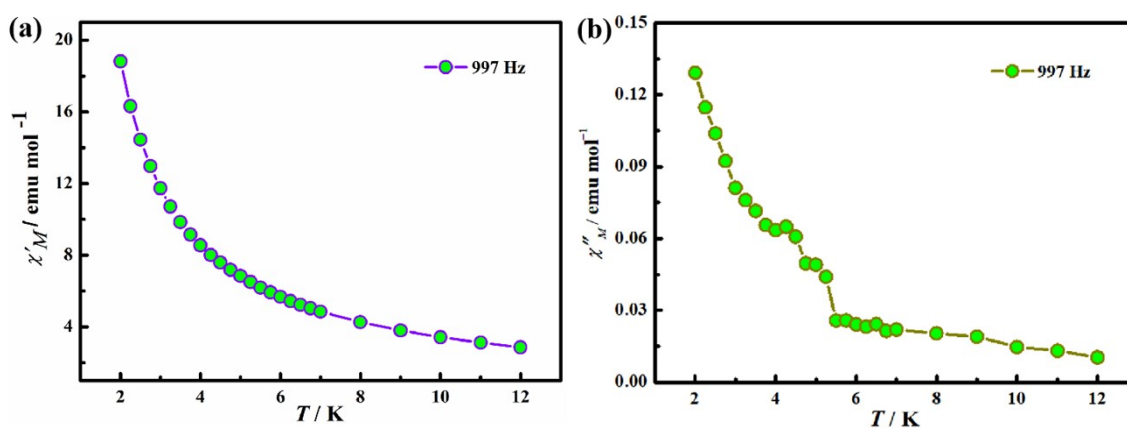

**Figure S12.** The in-phase( $\chi'$ ) and out-of-phase ( $\chi''$ ) components of ac magnetic susceptibility for **1** at  $H_{dc} = 0$  Oe.

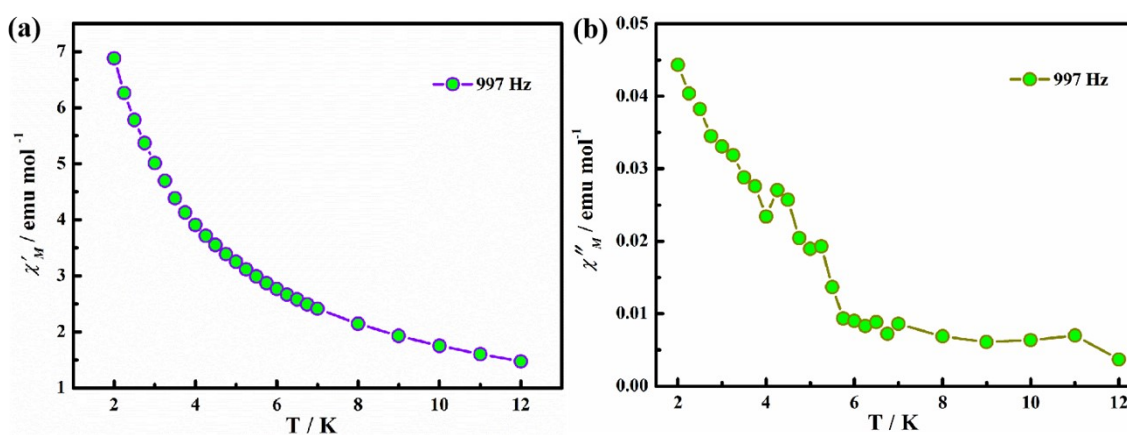

**Figure S13.** The in-phase( $\chi'$ ) and out-of-phase ( $\chi''$ ) components of ac magnetic susceptibility for **2** at  $H_{dc} = 0$  Oe.



**Table S8.** The fitting parameters  $\alpha$  and  $\tau$  values for **1** and **2** by using CC-FIT software from 2 to 3.5 K at  $H_{dc} = 2$  kOe.

| $T$   | $\alpha_1$ | $\tau_1 / s$           | $\alpha_2 / s$ | $\tau_2 / s$ |
|-------|------------|------------------------|----------------|--------------|
| 2.0 K | 0.38       | $5.0 \times 10^{-4}$ s | 0.12           | 0.32 s       |
| 2.5 K | 0.45       | $4.4 \times 10^{-4}$ s | 0.14           | 0.21 s       |
| 3.0 K | 0.47       | $4.2 \times 10^{-4}$ s | 0.23           | 0.18 s       |
| 3.5 K | 0.47       | $5.0 \times 10^{-4}$ s | 0.19           | 0.12 s       |

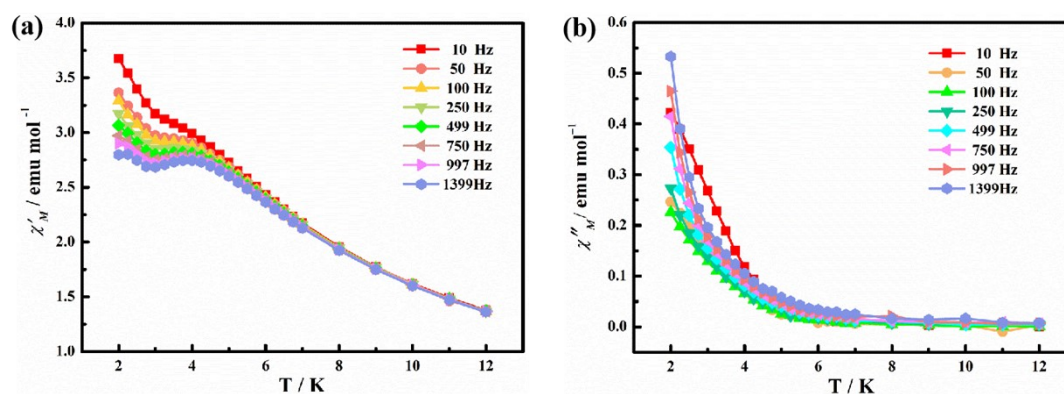

**Figure S14.** Temperature dependence of the in-phase ( $\chi'$ ) (a) and out-of-phase ( $\chi''$ ) (b) ac susceptibility for **2** under 2 kOe applied dc field.

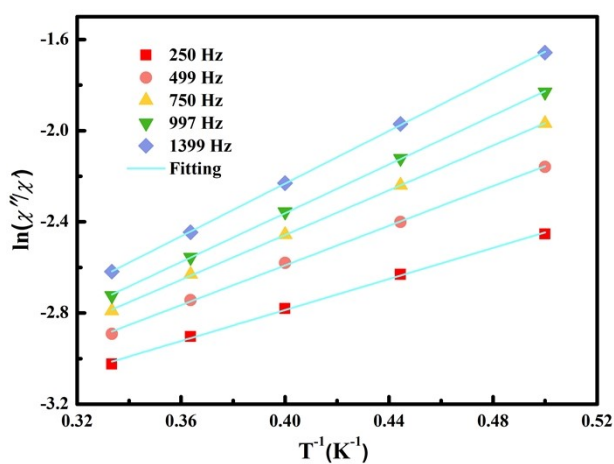

**Figure S15.**  $\ln(\chi''/\chi')$  vs.  $T^{-1}$  of MOF **2** under different frequency.

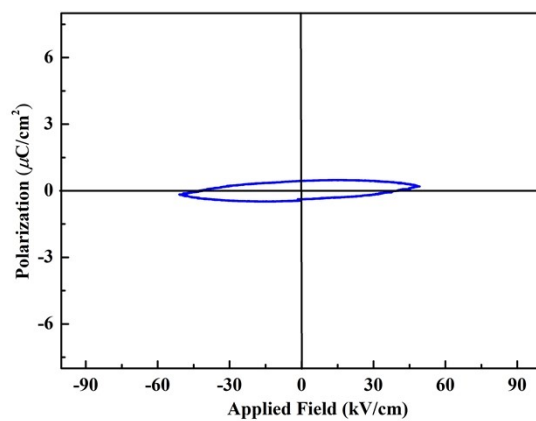

**Figure S16.** The measurement of ferroelectric hysteresis loops of MOF 1.

- 1 J. W Liu, X. Han, Y. T. Lu, S. Wang, D. Zhao and C. X. Li, *Inorg. Chem.*, 2021, **60**, 4133–4143.
